# Supplementary material for: Quantitative insights into tightly and loosely bound water in hydration shells of amino acids
Source: Royal Society of Chemistry journal article supplement (doi:10.1039/d1sm01234g), 2021-01-01
Supplement: d1sm01234g1.pdf [file d1sm01234g1.pdf]

Supporting Information  
for

**Quantitative insights into tightly and loosely bound water in hydration shells of amino acids**

Yutan Shen,<sup>ab</sup> Lu Liu,<sup>c</sup> Qiancheng Zheng,<sup>c</sup> Xi Zhao,<sup>c</sup> Yuchun Han,<sup>\*a</sup> Qianjin Guo<sup>\*d</sup> and Yilin Wang<sup>\*ab</sup>

<sup>a</sup>CAS Key Laboratory of Colloid, Interface and Chemical Thermodynamics, CAS Research/Education Center for Excellence in Molecular Sciences, Beijing National Laboratory for Molecular Sciences, Institute of Chemistry, Chinese Academy of Sciences, Beijing 100190, P. R. China

<sup>b</sup>University of Chinese Academy of Sciences, Beijing 100049, P. R. China

<sup>c</sup>Institute of Theoretical Chemistry, Jilin University, 130012, P. R. China

<sup>d</sup>Key Laboratory of Molecular Reaction Dynamics and Beijing National Laboratory for Molecular Sciences (BNLMS), Institute of Chemistry, Chinese Academy of Sciences, Beijing 100190, P. R. China

**Fig. S1.** DSC melting heat flow curve of pure water

**Fig. S2.** DSC melting curves of 20 amino acids and water mixtures in the  $W_C$  range of 0 to 8

**Fig. S3.** The change curves of the  $T_{\text{onset}}$  and  $\Delta H_w$  values against  $W_C$  for different amino acids

**Fig. S4.** Linear dependencies of the normalized melting enthalpy changes on the  $W_C$  for 20 amino acids

**Fig. S5.** Raman SC spectra of six amino acid aqueous solutions

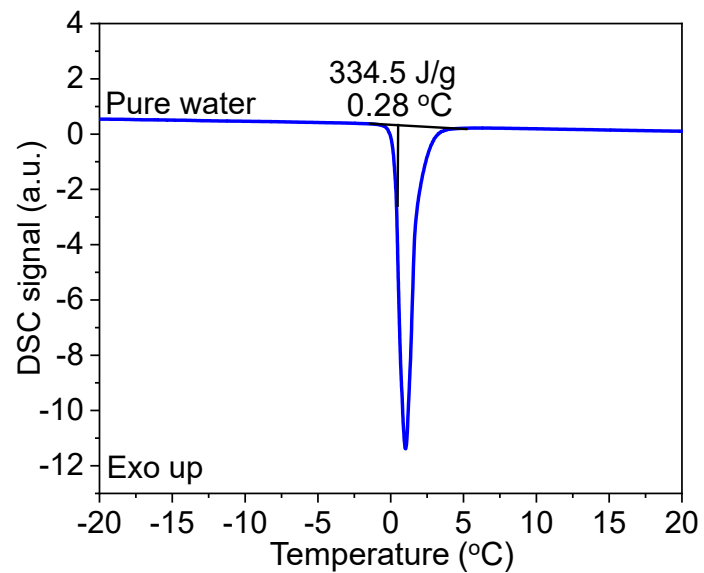

**Fig. S1** DSC melting heat flow curve of pure water. The onset transition temperature ( $T_{\text{onset}}$ ) and the obvious melting enthalpy change ( $\Delta H_{\text{obs}}$ ) of pure water are shown in the figure ( $T_{\text{onset}} = 0.28 \text{ }^{\circ}\text{C}$ ,  $\Delta H_{\text{obs}} = 334.5 \text{ J/g}$ ).

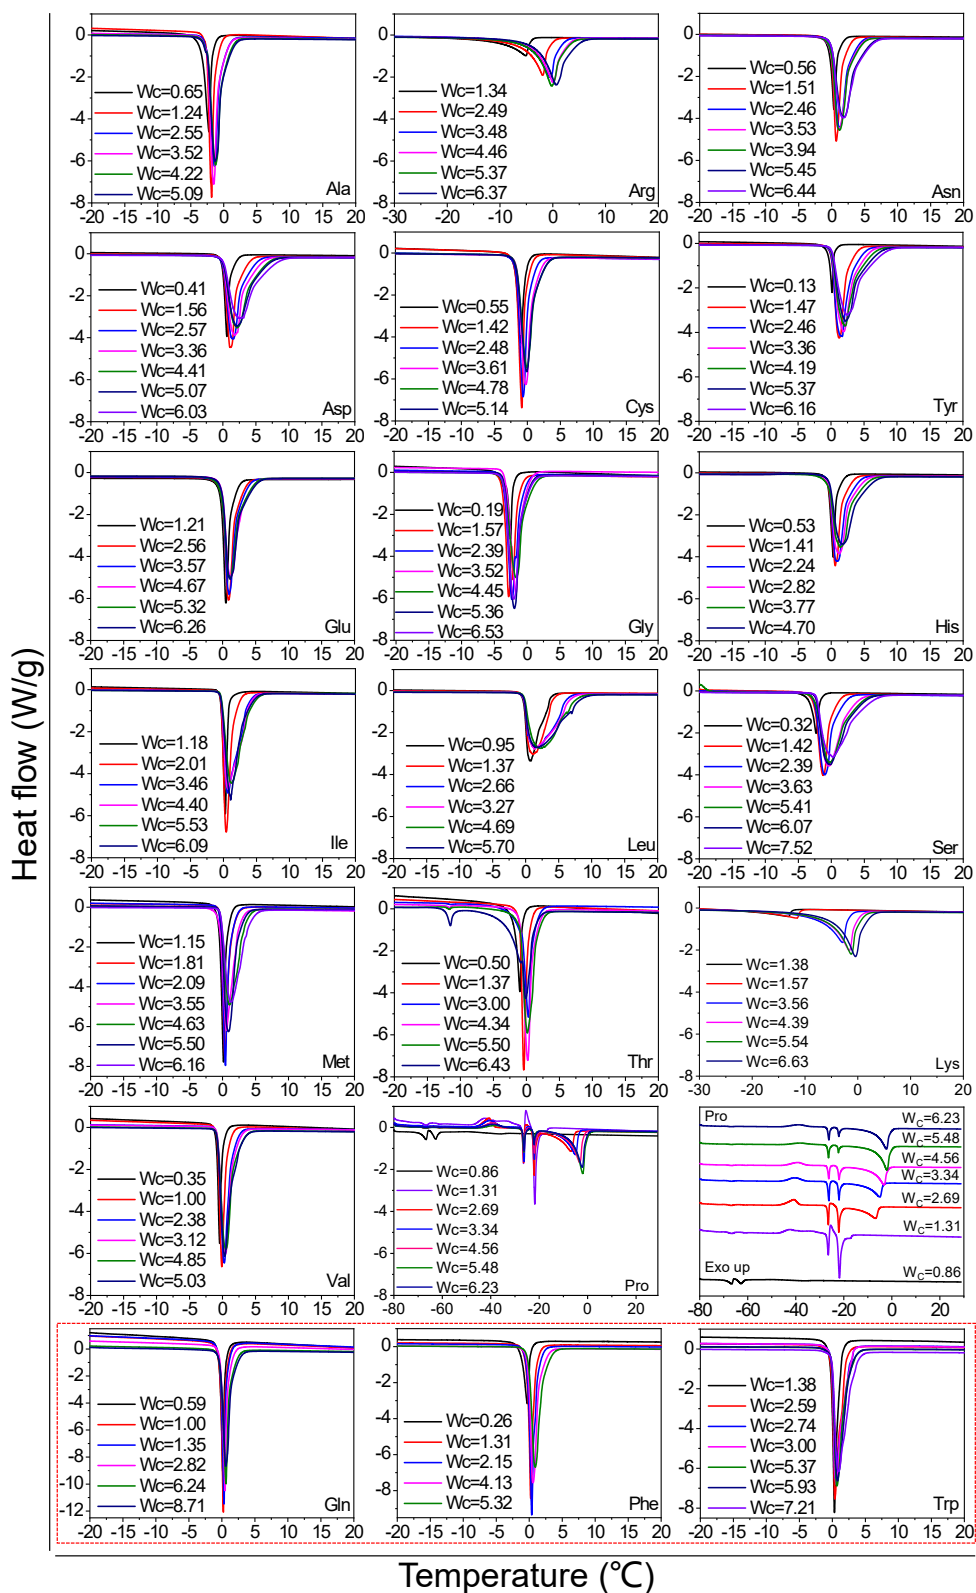

**Fig. S2** DSC melting heat flow curves of 20 amino acids and water mixtures in the  $W_C$  range of 0 to 8. The curves of Gln, Phe and Trp are shown in the lowest panel, and their heat flow curves are almost unchanged in the  $W_C$  ranges of 0 to 8.

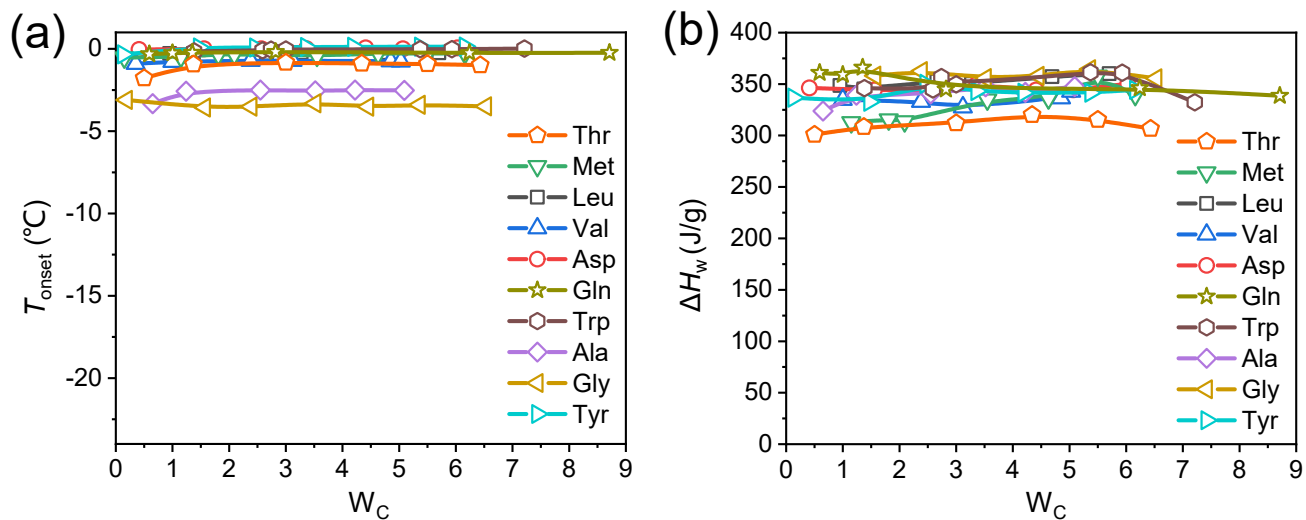

**Fig. S3** The change curves of the  $T_{\text{onset}}$  and  $\Delta H_w$  values against  $W_C$  for different amino acids. (a) Onset transition temperature ( $T_{\text{onset}}$ ) values of amino acids and water mixtures against  $W_C$  for different amino acids. (b) Melting enthalpy  $\Delta H_w$  values (normalized to the water weight) of water molecules against  $W_C$  for different amino acids.

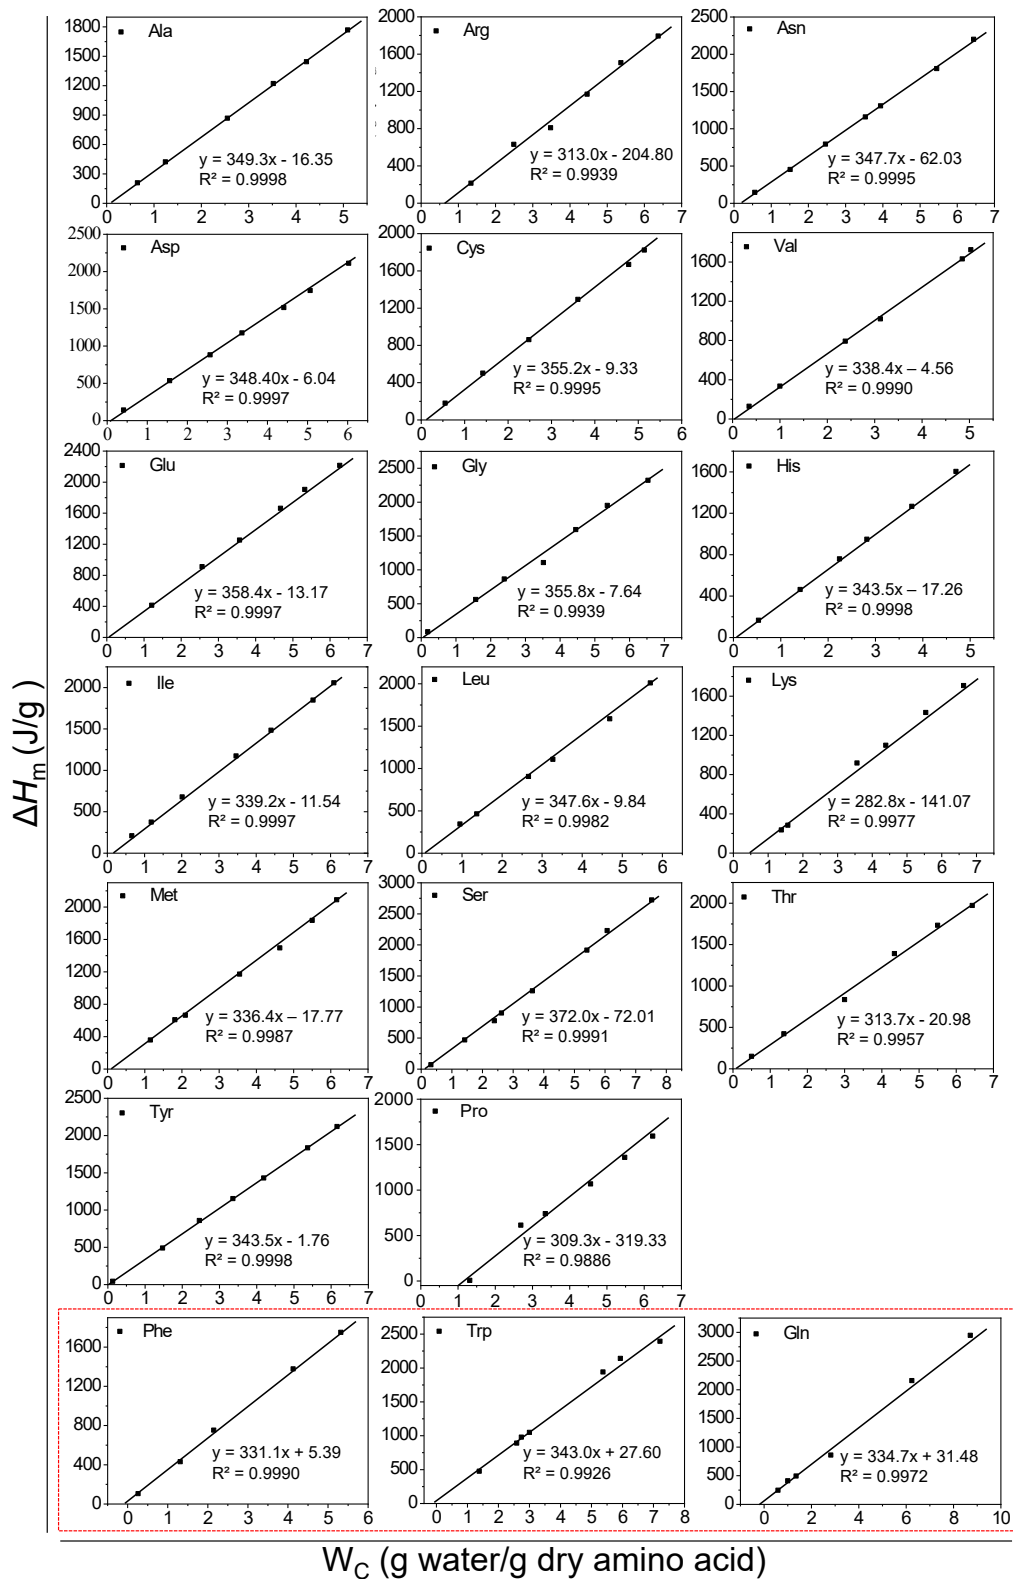

**Fig. S4** Linear dependencies of the normalized melting enthalpy changes on the  $W_C$  for 20 amino acids. The melting enthalpy changes ( $\Delta H_m$ ) are normalized to the amino acid weight, and plotted as a function of water content ( $W_C$ ) of amino acids. The x-intercept represents the amount of tightly bound water. The negative x-intercept values of Phe, Trp and Gln are shown in the lowest panel.

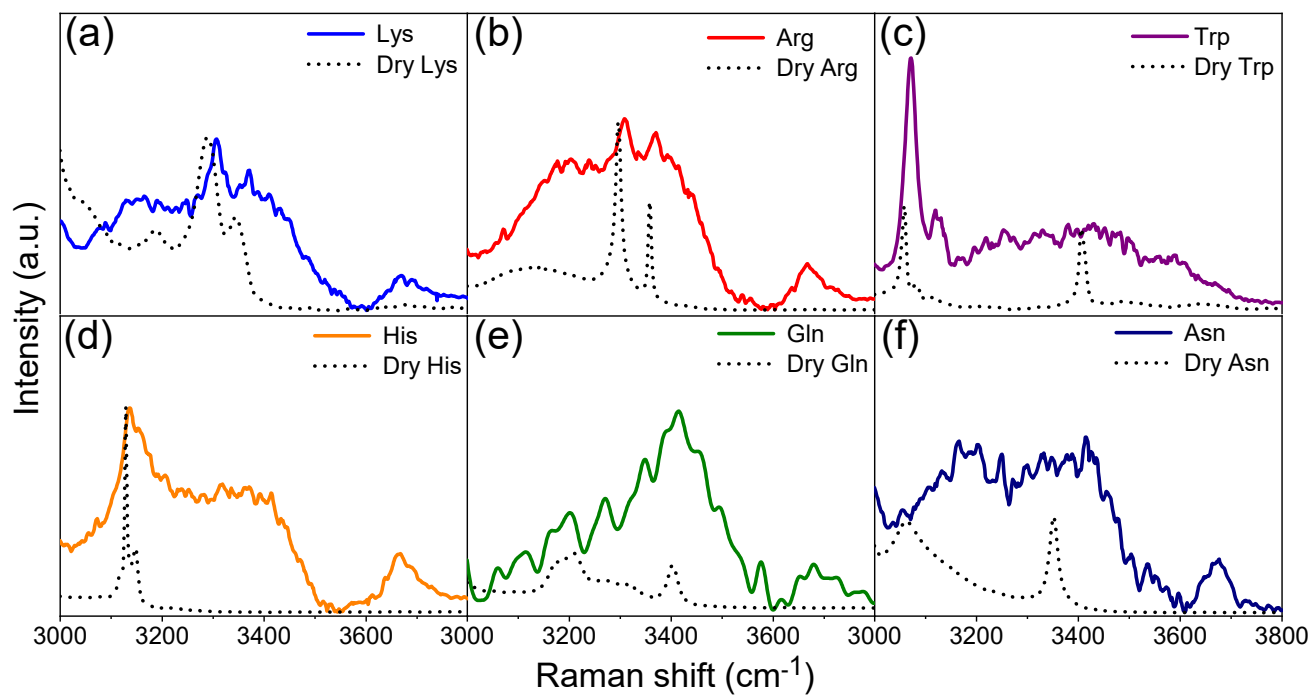

**Fig. S5** Raman SC spectra of six amino acid aqueous solutions. Raman SC spectra of 0.10 M Lys (a), 0.10 M Arg (b), 0.05 M Trp (c), 0.10 M His (d), 0.05 M Gln (e) and 0.10 M Asn (f), and the Raman spectra of their corresponding dry amino acid samples (black, dash) are also presented for comparisons.
